# Supplementary material for: Alteration of Asian lacquer: in-depth insight using a physico-chemical multiscale approach
Source: Royal Society of Chemistry journal article supplement (doi:10.1039/c3an00608e), 2013-01-01
Supplement: c3an00608e.pdf [file c3an00608e.pdf]

### Electronic Supplementary information

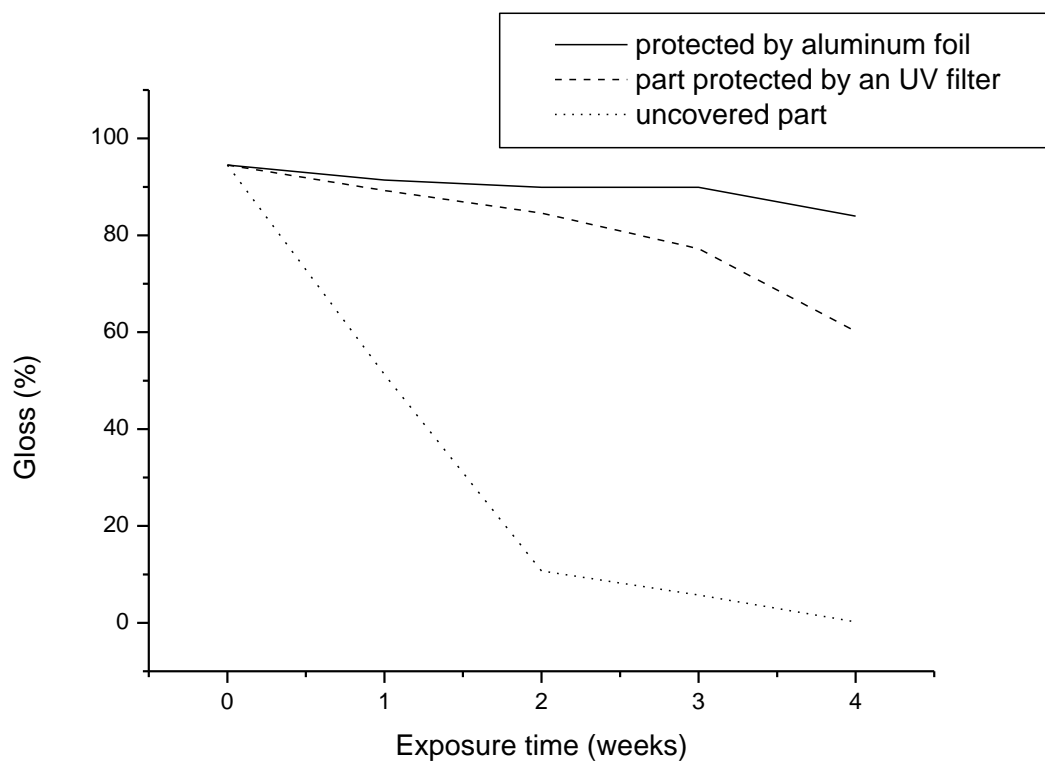

**Supplementary Figure 1s:** gloss measurements during the artificial ageing of sample boards (Glossmeter Zehntner ZLR 1050 M with a spectral reflection angle of 60°)
